# Supplementary material for: One-Step Production of Highly Selective Ethylbenzene and Propylbenzene from Benzene and Carbon Dioxide via Coupling Reaction
Source: MDPI journal article supplement (doi:10.3390/catal14050288), 2024-04-24
Supplement: s1 [file s1]

## Table of Contents

**Figure S1** TEM images of (a)  $\text{ZnGaO}_x$ ; (b)  $\text{ZnAlO}_x$ ; (c)  $\text{Zn}_2\text{Ga}_{0.5}\text{Al}_{1.5}\text{O}_x$ .

**Figure S2** XRD patterns of (a) hierarchical SAPO-34, (b) commercial ZSM-5 and (c) comparison of commercial and hierarchical ZSM-5 (Si/Al=65).

**Figure S3**  $\text{NH}_3$ -TPD patterns of (a) hierarchical SAPO-34 with different Si/Al ratio, (b) commercial ZSM-5 zeolites, (c) comparison of commercial and hierarchical ZSM-5 (Si/Al=65)

**Figure S4** IR spectra of commercial ZSM-5 with different Si/Al ratio measured at 200 °C (a) and 500 °C (b); comparison of commercial and hierarchical ZSM-5 (Si/Al=65) (c).

**Figure S5** Nitrogen adsorption isotherms of SAPO-34 and ZSM-5.

**Table S1** Textural properties and surface compositions of SAPO-34 and ZSM-5. Si/Al ratio.

### Method for Calculating Carbon Balance

The value of carbon balance was obtained using the following equation:

$$\text{Carbon balance} = \frac{C_6H_{6\text{outlet}} + CO_{2\text{outlet}} + CO_{\text{outlet}} + \sum_1^a a C_a H_{\text{boutlet}}}{C_6H_{6\text{inlet}} + CO_{2\text{inlet}}} * 100\%$$

Where  $C_a H_{\text{boutlet}}$  ( $a \geq 1$ ) represents the moles of hydrocarbons at the outlet; the subscripts “inlet” and “outlet” indicate the molar quantities at the outlet and inlet.

The internal standard method was used to determine the volume fraction of each component with  $N_2$  as the internal standard. The relative correction factor was calculated using the following equation:

$$\lambda = \frac{S_{N_2} * C}{C_{N_2} * S}$$

where C represents the volume fraction of the component, and S represents the peak area in the chromatogram.

The formula for the conversion rate and selectivity of each substance is as

follows:

Benzene conversion rate:

$$\alpha = \frac{C_6H_{6inlet} - C_6H_{6outlet}}{C_6H_{6inlet}}$$

Liquid phase aromatics product distribution:

$$Sel\ C_aH_b = \frac{C_aH_{boutlet}}{\sum C_iH_{joutlet}}$$

$C_iH_j$  represents the aromatics products, such as toluene, xylene, ethylbenzene, propylbenzene, and other  $C_{9+}$ .  $C_iH_{joutlet}$  and  $C_aH_{boutlet}$  represent the moles number of individual aromatics at the outlet.

Gas phase hydrocarbons distribution:

$$Sel\ C_aH_b = \frac{aC_aH_{boutlet}}{\sum iC_iH_{joutlet}}$$

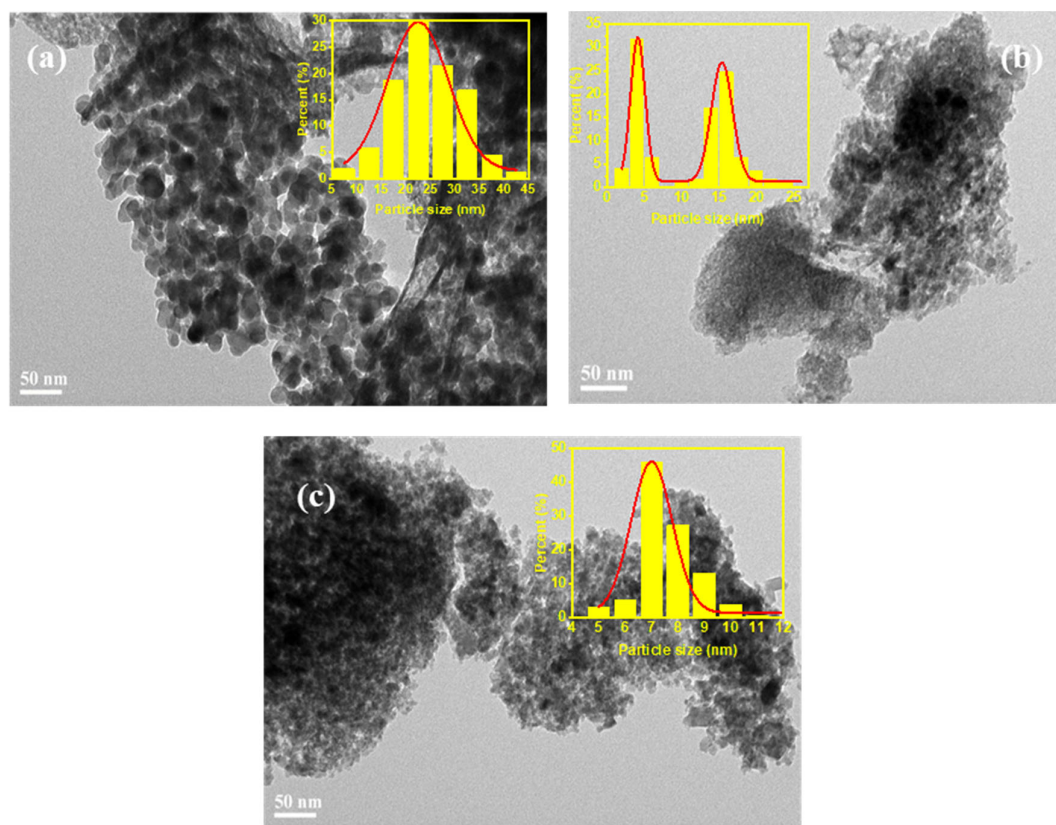

**Figure S1. TEM images of (a) ZnGaO<sub>x</sub>; (b) ZnAlO<sub>x</sub>; (c) Zn<sub>2</sub>Ga<sub>0.5</sub>Al<sub>1.5</sub>O<sub>x</sub>.**

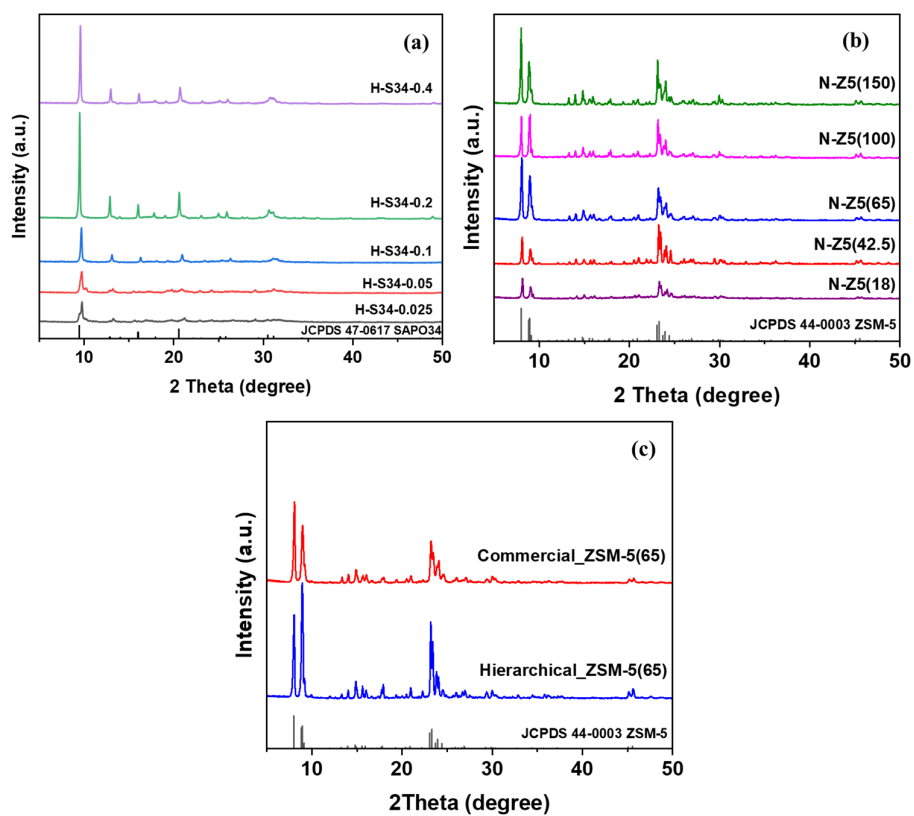

**Figure S2. XRD patterns of (a) hierarchical SAPO-34, (b) commercial ZSM-5 and (c) comparison of commercial and hierarchical ZSM-5 (Si/Al=65).**

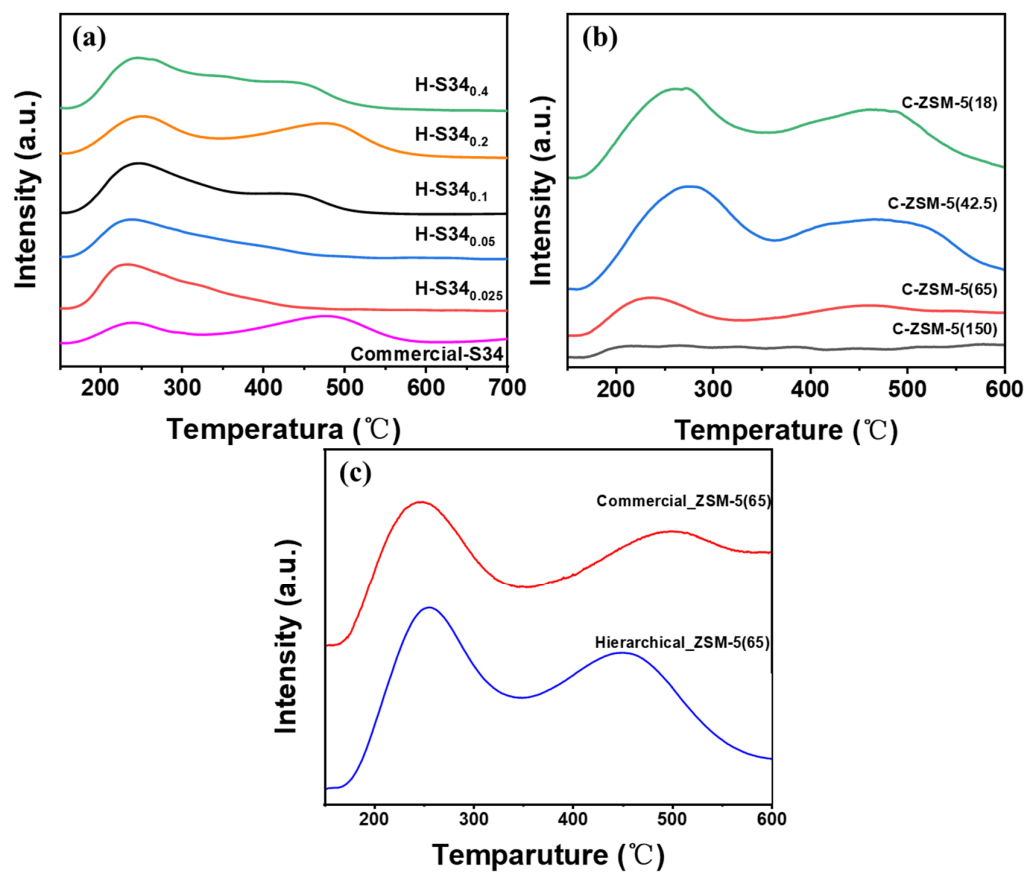

**Figure S3. NH<sub>3</sub>-TPD patterns of (a) hierarchical SAPO-34 with different Si/Al ratio, (b) commercial ZSM-5 zeolites, (c) comparison of commercial and hierarchical ZSM-5 (Si/Al=65)**

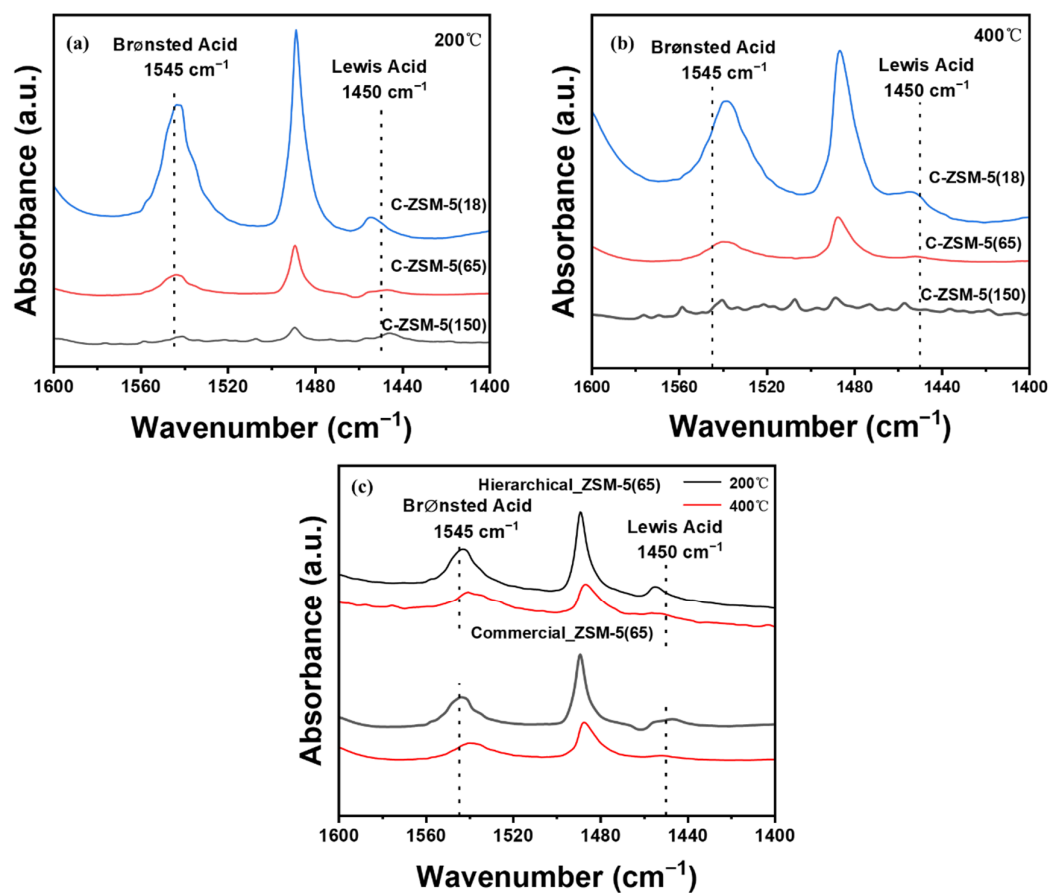

**Figure S4.** IR spectra of commercial ZSM-5 with different Si/Al ratio measured at 200 °C (a) and 500 °C (b); comparison of commercial and hierarchical ZSM-5 (Si/Al=65) (c).

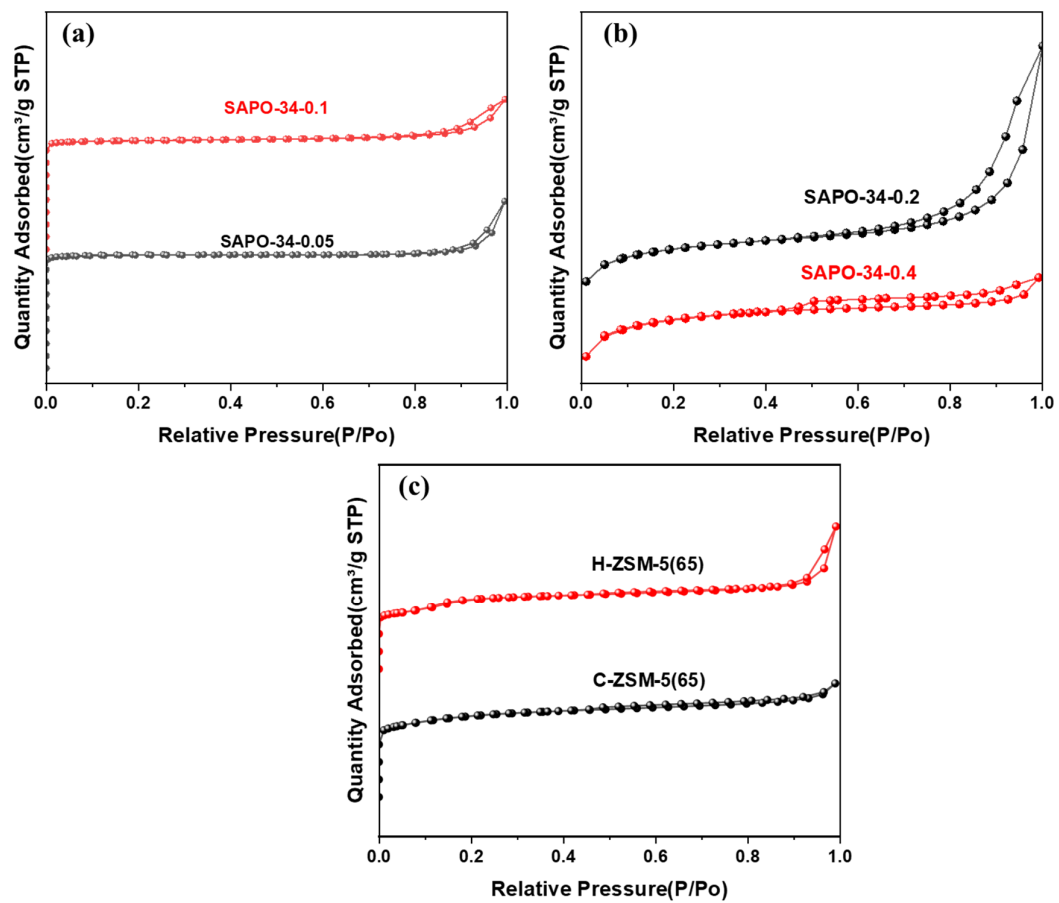

Figure S5. Nitrogen adsorption isotherms of SAPO-34 and ZSM-5.



**Table S1.** Textural properties and surface compositions of SAPO-34 and ZSM-5.

| Sample        | $S_{\text{BET}}/(\text{m}^2 \cdot \text{g}^{-1})$ | $S_{\text{ext}}/(\text{m}^2 \cdot \text{g}^{-1})$ | $S_{\text{micro}}/(\text{m}^2 \cdot \text{g}^{-1})$ | $V_{\text{total}}/(\text{cm}^3 \cdot \text{g}^{-1})$ | $V_{\text{micro}}/(\text{cm}^3 \cdot \text{g}^{-1})$ |
|---------------|---------------------------------------------------|---------------------------------------------------|-----------------------------------------------------|------------------------------------------------------|------------------------------------------------------|
| SAPO-34-0.025 | 551                                               | 14                                                | 0.25                                                | 0.33                                                 | 536                                                  |
| SAPO-34-0.05  | 615                                               | 13                                                | 0.31                                                | 0.45                                                 | 601                                                  |
| SAPO-34-0.1   | 593                                               | 24                                                | 0.29                                                | 0.41                                                 | 570                                                  |
| SAPO-34-0.2   | 476                                               | 16                                                | 0.21                                                | 0.30                                                 | 459                                                  |
| SAPO-34-0.4   | 481                                               | 10                                                | 0.22                                                | 0.24                                                 | 471                                                  |
| C-SAPO-34     | 2                                                 | 1                                                 | 0                                                   | 0                                                    | 1                                                    |
| H-ZSM-5(65)   | 366                                               | 137                                               | 229                                                 | 0.29                                                 | 0.1                                                  |
